# Supplementary material for: Hydrothermal growth of biomimetic carbonated apatite nanoparticles with tunable size, morphology and ultrastructure
Source: Royal Society of Chemistry journal article supplement (doi:10.1039/c3ce26884e), 2013-01-01
Supplement: c3ce26884e.pdf [file c3ce26884e.pdf]

## Electronic Supplementary Information

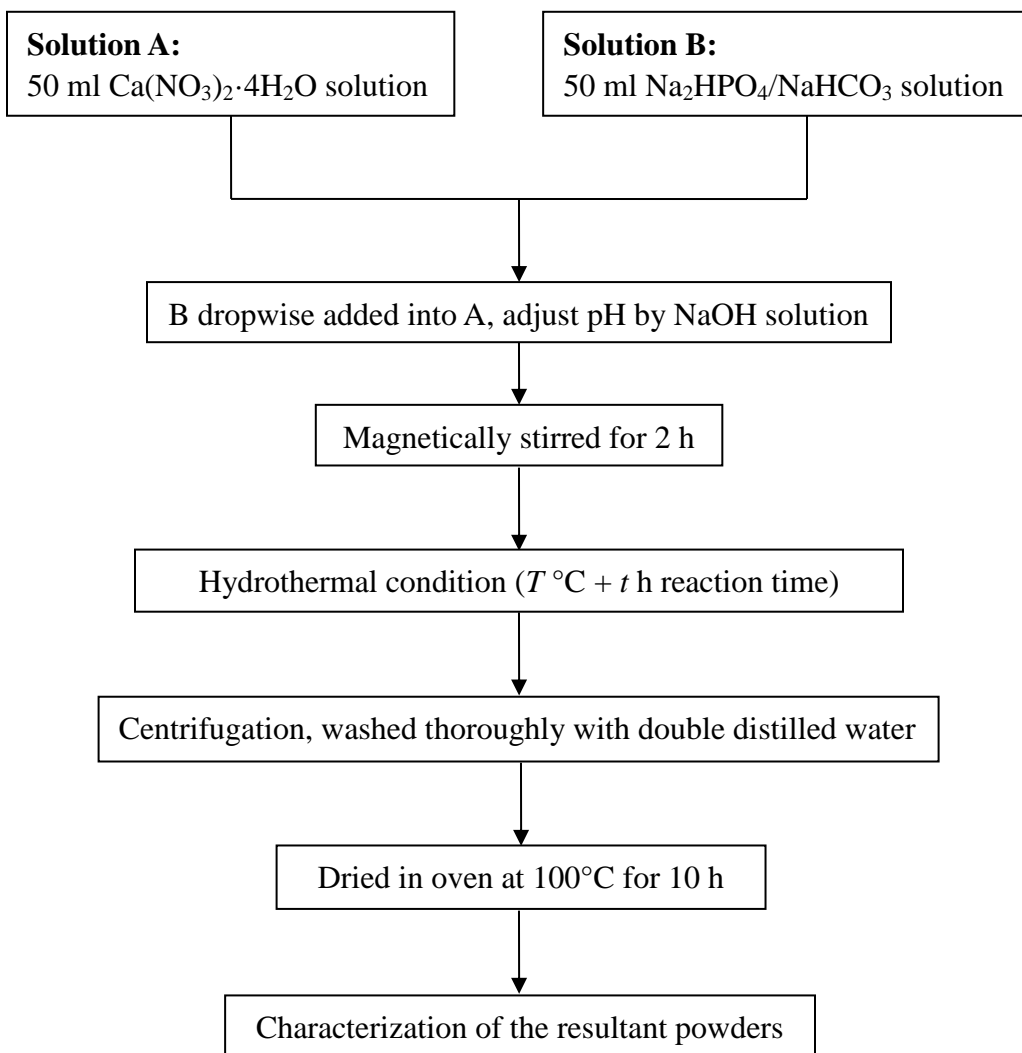

**Figure S1.** Illustrative flowchart of hydrothermal synthesis procedure

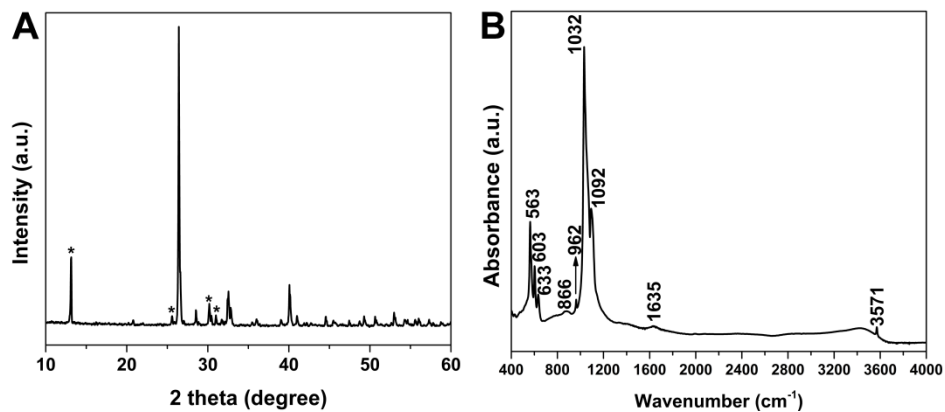

**Figure S2.** XRD pattern (A) and FTIR spectrum (B) of the product synthesized at pH=5.4. The asterisks in (A) mark the diffraction peaks from CaHPO<sub>4</sub>. The vibrational bands at 866 cm<sup>-1</sup> and 1635 cm<sup>-1</sup> in (B) are assigned to HPO<sub>4</sub> group and bending mode of water respectively.

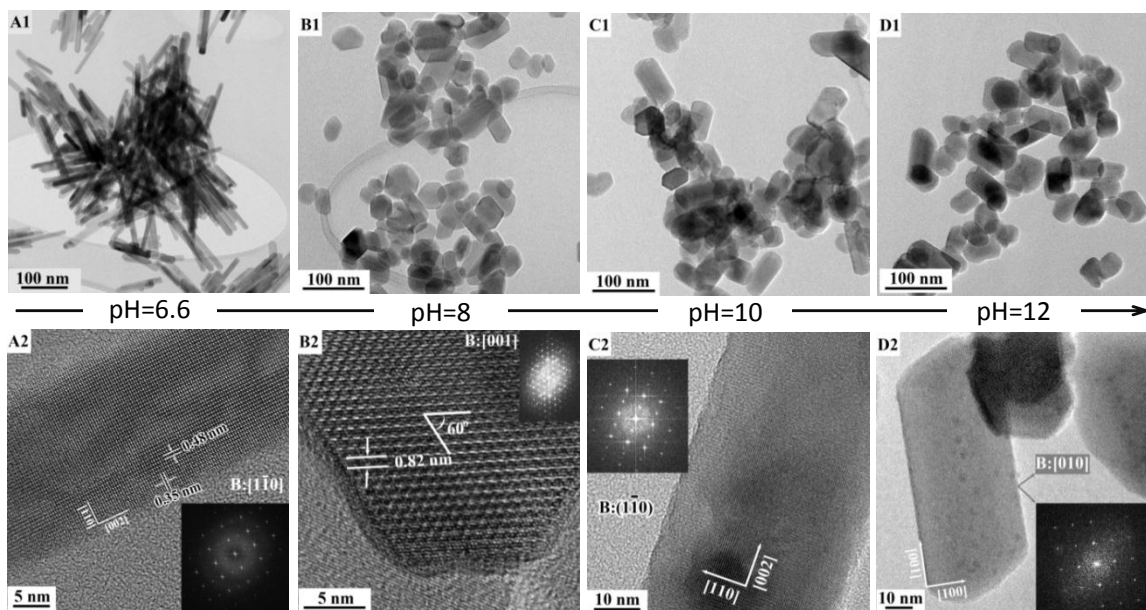

**Figure S3.** Bright-field TEM and HRTEM images of the nanoparticles prepared at varying pH. (A1) pH = 6.6; (B1) pH = 8; (C1) pH = 10; and (D1) pH = 12. Insets in the HRTEM images are the corresponding fast Fourier transform (FFT) patterns. (A2) shows the typical HA nanorod. Three typical facets (001), ( $1\bar{1}0$ ) and (010) of CAP nanocrystals are shown in (B2), (C2) and (D2) respectively.

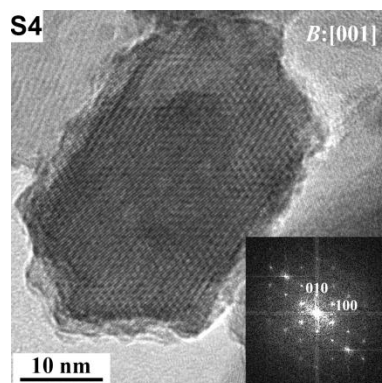

**Figure S4.** HRTEM image of the CAp nanocrystal with elongated hexagonal shape and corresponding Fast Fourier Transform (FFT). The beam direction is along [001].

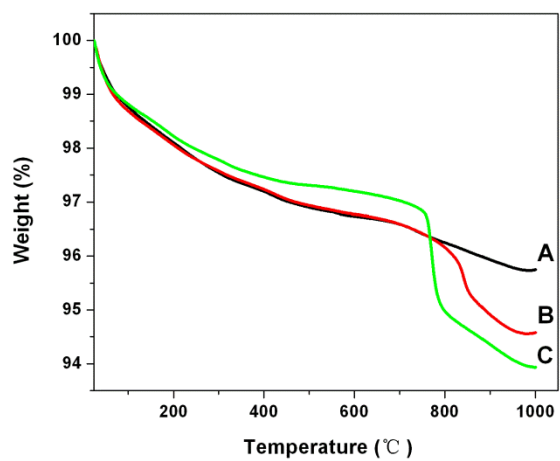

**Figure S5.** TGA curves of CAp with different C/P atomic ratios in starting solution. (A)

CAp with C/P = 1/3; (B) CAp with C/P = 2/3; and (C) CAp with C/P = 1.

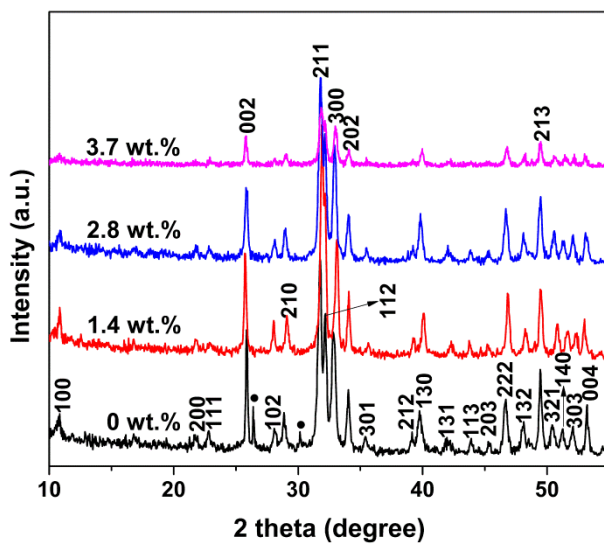

**Figure S6.** XRD patterns of the samples with varying carbonate content. The black solid balls mark the  $\text{CaHPO}_4$  impurity phase present in the sample free of carbonate.

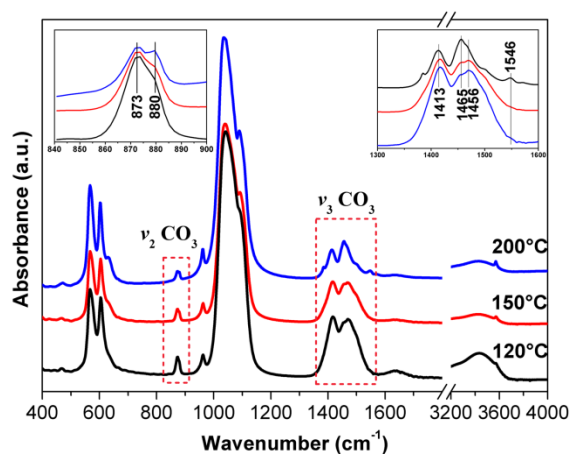

**Figure S7.** FTIR spectra of CAP prepared at different temperatures for 12 h (C/P =2/3, pH = 10).
